# Supplementary material for: Promotion of neurite outgrowth by rationally designed NGF-β binding peptide nanofibers
Source: Royal Society of Chemistry journal article supplement (doi:10.1039/c8bm00311d), 2018-01-01
Supplement: c8bm00311d1.pdf [file c8bm00311d1.pdf]

## Supporting Information for

### Promotion of neurite outgrowth by rationally designed

### NGF- $\beta$ binding peptide nanofibers

Zeynep Okur <sup>a,b</sup>, Oya I. Senturk <sup>a</sup>, Canelif Yilmaz <sup>a,b</sup>, Gulcihan Gulseren <sup>a</sup>, Busra Mammadov <sup>a</sup>, Mustafa O. Guler <sup>c,d</sup>, Ayse B. Tekinay <sup>a,b,d</sup>

<sup>a</sup> *National Nanotechnology Research Center (UNAM), Bilkent University, Ankara, 06800, Turkey*

<sup>b</sup> *Neuroscience Graduate Program, Bilkent University, Ankara, 06800, Turkey*

<sup>c</sup> *Institute for Molecular Engineering, University of Chicago, Chicago, IL 60637, USA*

<sup>d</sup> *Corresponding author*

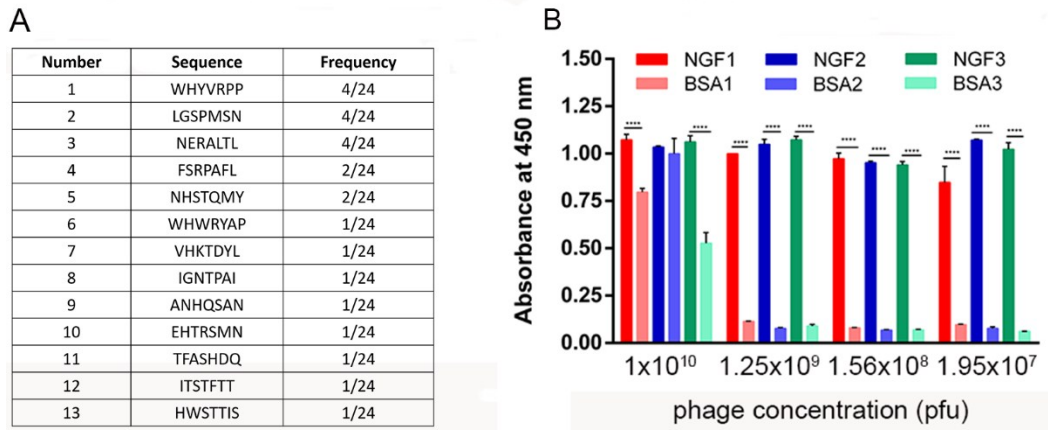

**Fig. S1.** Identification of phage-displayed peptide sequences binding to NGF- $\beta$  and affinity analysis of selected phage colonies for NGF- $\beta$ . Summary of consensus NGF- $\beta$  binding peptides (A). ELISA of binding ability of selected serially diluted (with 1:8 ratio) phage clones (number 1, number 2 and number 3 are represented as NGF1, NGF2 and NGF3, respectively) to NGF \*\*\*\* $P < 0.0001$  versus blocking buffer sample (BSA) (B). Data presented are the mean OD values ( $\pm$  SEM) of triplicate samples.

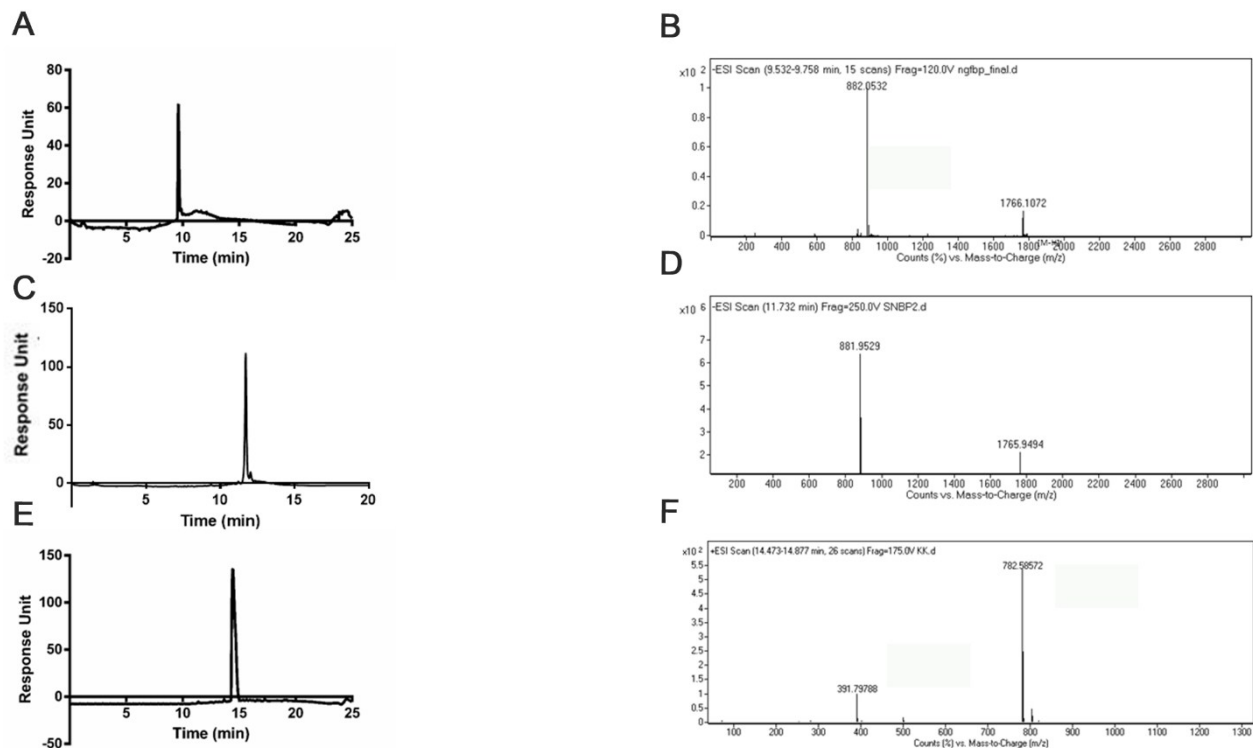

**Figure S2.** Liquid chromatography and mass spectrometry analysis of peptide amphiphile (PA) molecules. HPLC chromatogram of purified NGFB-PA (A), scrNGFB-PA (C) and KK-PA (E) molecules at 220 nm. Mass spectra of peptides; for NGFB-PA  $[M-H]^-$  (calculated) = 1766.03,  $[M-H]^-$  (observed) = 1766.10 (A),  $[M/2-H]^-$  (calculated) = 883.01,  $[M/2-H]^-$  (observed) = 882.05 (B), for scrNGFB-PA  $[M-H]^-$  (calculated) = 1766.03,  $[M-H]^-$  (observed) = 1765.94,  $[M/2-H]^-$  (calculated) = 883.01,  $[M/2-H]^-$  (observed) = 881.95 (D), for KK-PA  $[M+H]^+$  (calculated) = 781.58,  $[M+H]^+$  (observed) = 782.58,  $[M/2+H]^+$  (calculated) = 390.79,  $[M/2+H]^+$  (observed) = 391.79 (F).

**A**

| Peptide sequence            | Nomenclature         | Net charge (*) |
|-----------------------------|----------------------|----------------|
| NERALTL-GEEGAVVK(Lauryl)-Am | NGFB-PA              | -2             |
| RNTLLAE-GEEGAVVK(Lauryl)-Am | scrNGFB-PA           | -2             |
| Lauryl-VVAGKK-Am            | KK-PA                | +2             |
| <b>Peptide Mixtures</b>     |                      |                |
| NGFB-PA/KK-PA               | NGFB-PA nanofiber    | 0              |
| scrNGFB-PA/KK-PA            | scrNGFB-PA nanofiber | 0              |

(\*) Theoretical net charge at pH 7.4

**B**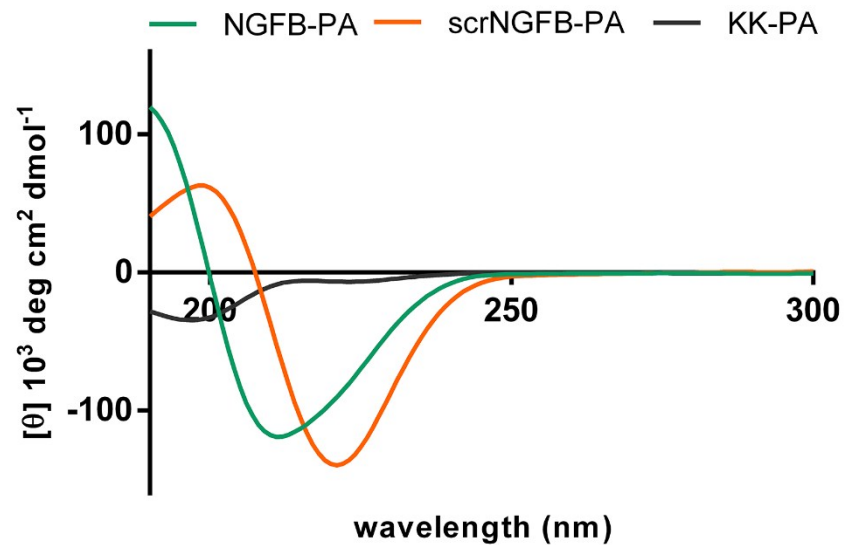

**Figure S3.** Abbreviations and charges of peptide sequences and peptide mixtures (A). The secondary structure analysis of peptide amphiphiles were analyzed by circular dichroism at pH 7.4 (B).

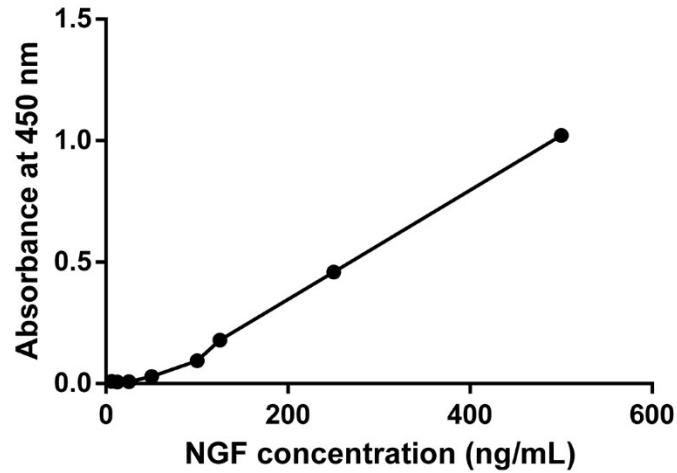

**Figure S4.** ELISA standard graph of human NGF- $\beta$  antibody against NGF- $\beta$  shows that the affinity of the antibody for NGF- $\beta$  is concentration dependent.

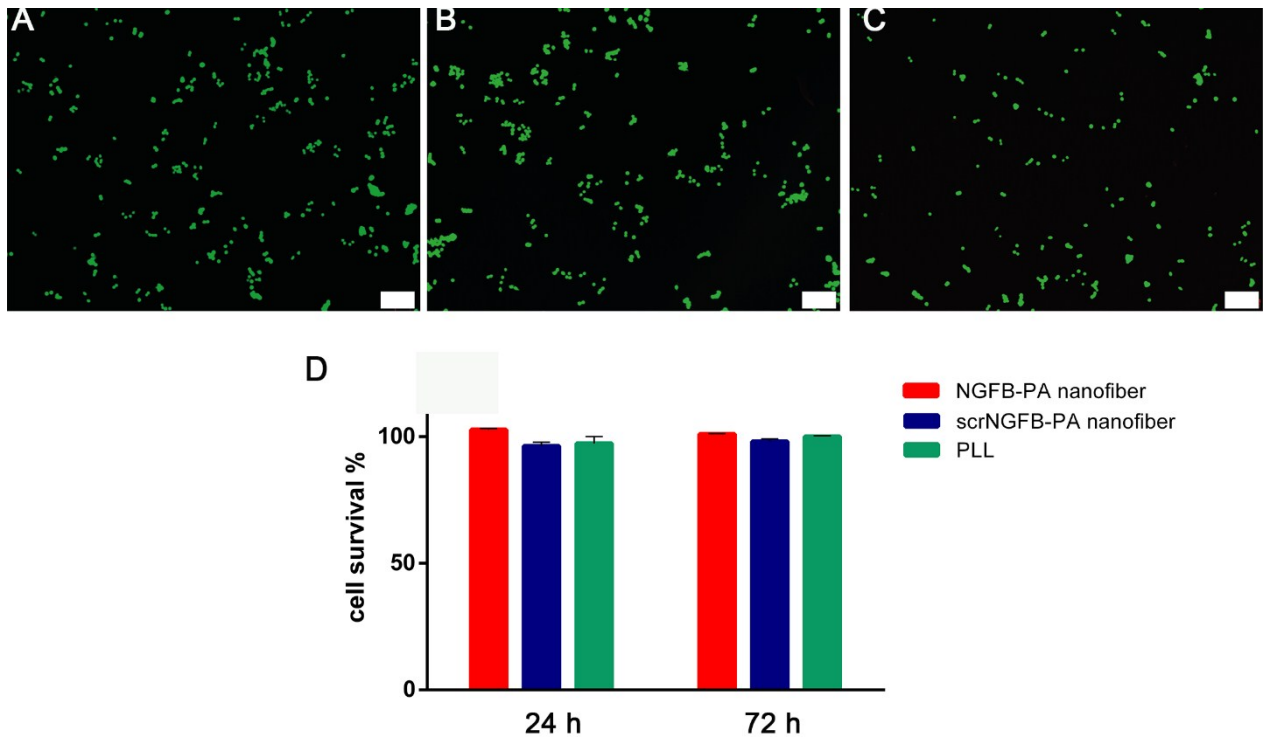

**Figure S5.** Viability of PC-12 cells cultured on NGFB-PA nanofiber (A), scrNGFB-PA nanofiber (B) and PLL (C) was analyzed by Alamar Blue Assay for 24 h and 72 h (D). Representative images were taken after cells were co-stained with 2  $\mu$ M calcein-AM (green) and 4  $\mu$ M ethidium

homodimer (red) in 1X PBS. Qualitative and quantitative results showed that peptide nanofibers are biocompatible for PC-12 cells. No significant differences exist between cell survival percentages of cells cultured on different scaffolds. Scale bar is 50  $\mu\text{m}$ .
